# Supplementary material
Source: PubMed Central journal article supplement (PMC3381794)
Supplement: NIHMS378955-supplement-01.pdf [file NIHMS378955-supplement-01.pdf]

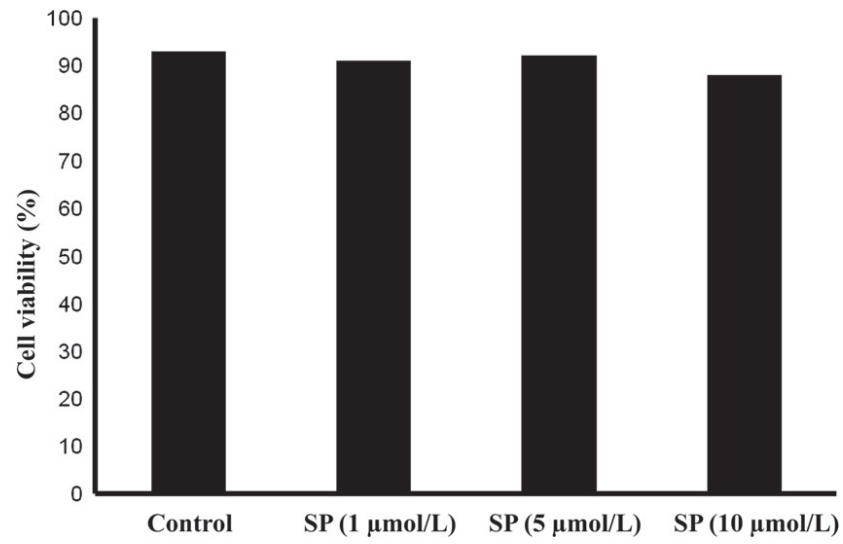

**FIG E1.** Viability testing during human mast cell degranulation. LAD2 cells were stimulated with different concentrations of SP for 30 minutes. Cell viability was tested by using Trypan blue exclusion.

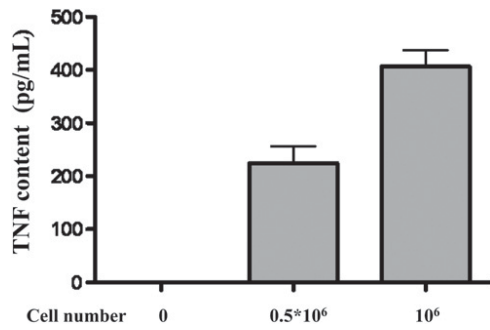

**FIG E2.** Detection of preformed TNF in unstimulated LAD2 mast cells. Unstimulated LAD2 cells were lysed and sonicated to release all intracellular components. TNF concentration was determined by ELISA (n = 3).

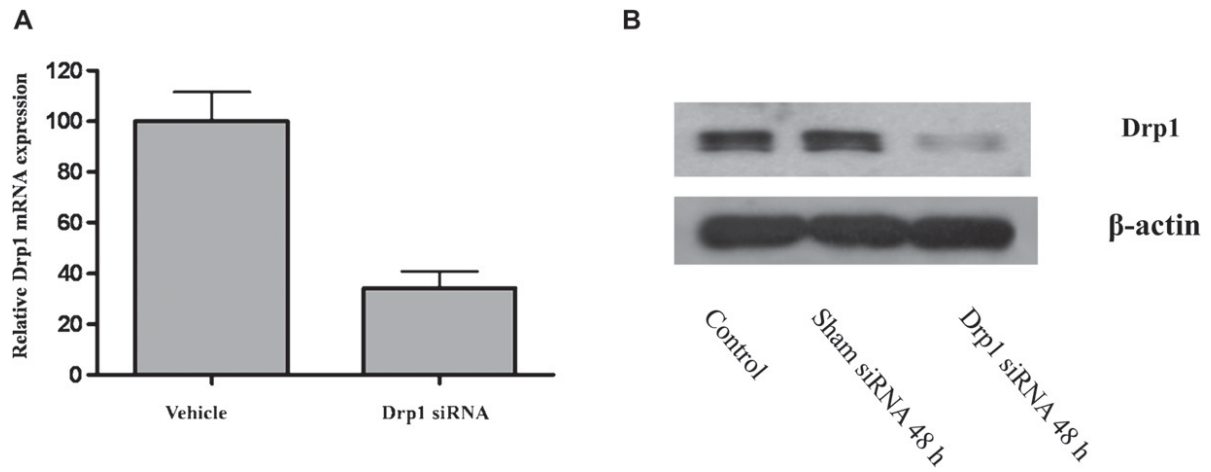

**FIG E3.** Decrease in Drp1 mRNA (**A**) and protein (**B**) after siRNA treatment of LAD2 cells. LAD2 cells were transfected with Drp1 siRNA for 5 hours and incubated in growth medium for 6 hours. **A**, TaqMan PCR was performed (n = 3). **B**, Western blot analysis of the Drp1 protein 48 hours after siRNA treatment.

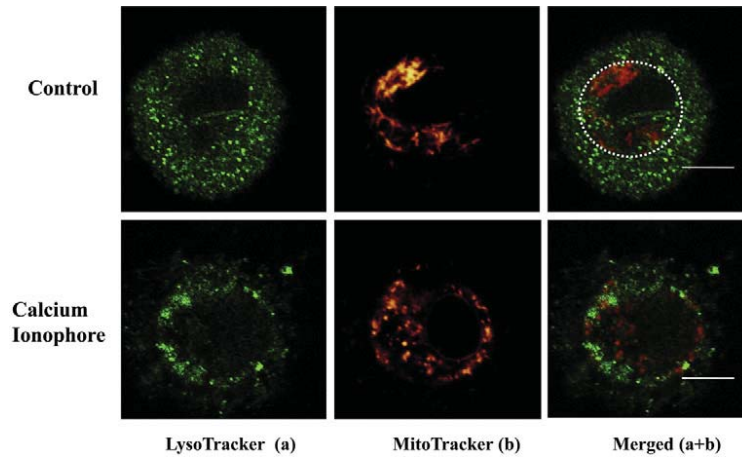

**FIG E4.** Effect of the cation ionophore A23187 on LAD2 mitochondrial translocation. LAD2 cells were either unstimulated (*upper panels*) or stimulated with calcium ionophore A23187 (1  $\mu\text{mol/L}$ ) for 30 minutes (*lower panels*). Cells were stained with LysoTracker (*a*, green) and MitoTracker (*b*, red). Bars equal 5  $\mu\text{m}$ .

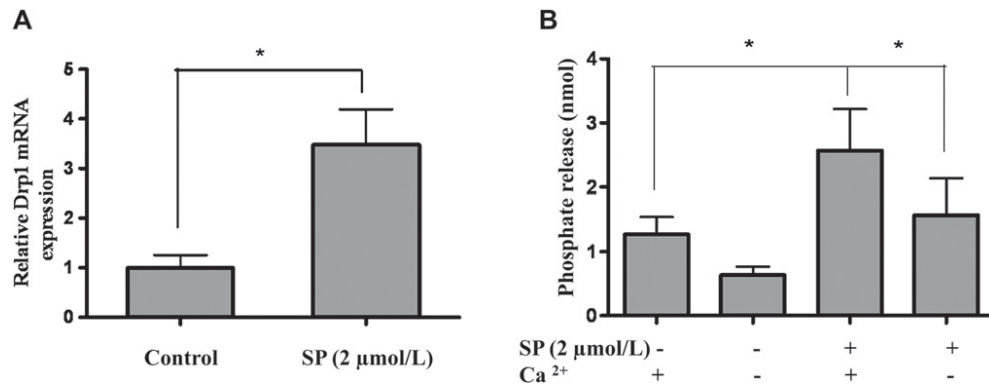

**FIG E5.** Increased gene expression of Drp1 (**A**) and calcineurin activity (**B**) after SP stimulation of LAD2 cells for 6 hours. *A*, Drp1 gene expression in SP-stimulated LAD2 cells for 6 hours. *B*, LAD2 cells were stimulated by SP for 30 minutes in either calcium or calcium-free medium. Calcineurin activity was measured as phosphate release following the protocol provided ( $n = 3$ ;  $*P < .05$ ). There was no statistical difference in calcineurin activity between control and SP stimulation in the absence of calcium.

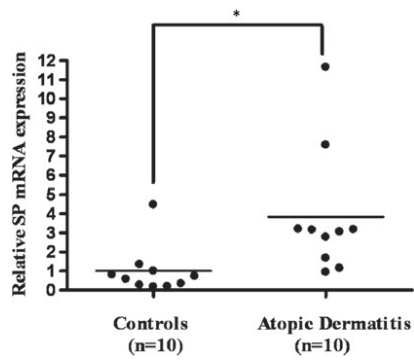

**FIG E6.** Increased TAC1 gene expression in lesional skin from patients with AD compared with controls. Gene expression of TAC1 (controls, n = 10; patients, n = 10). Relative quantities of mRNA expression were measured by quantitative real-time PCR and normalized to GAPDH (\* $P < .05$ ; horizontal bars indicate the means).

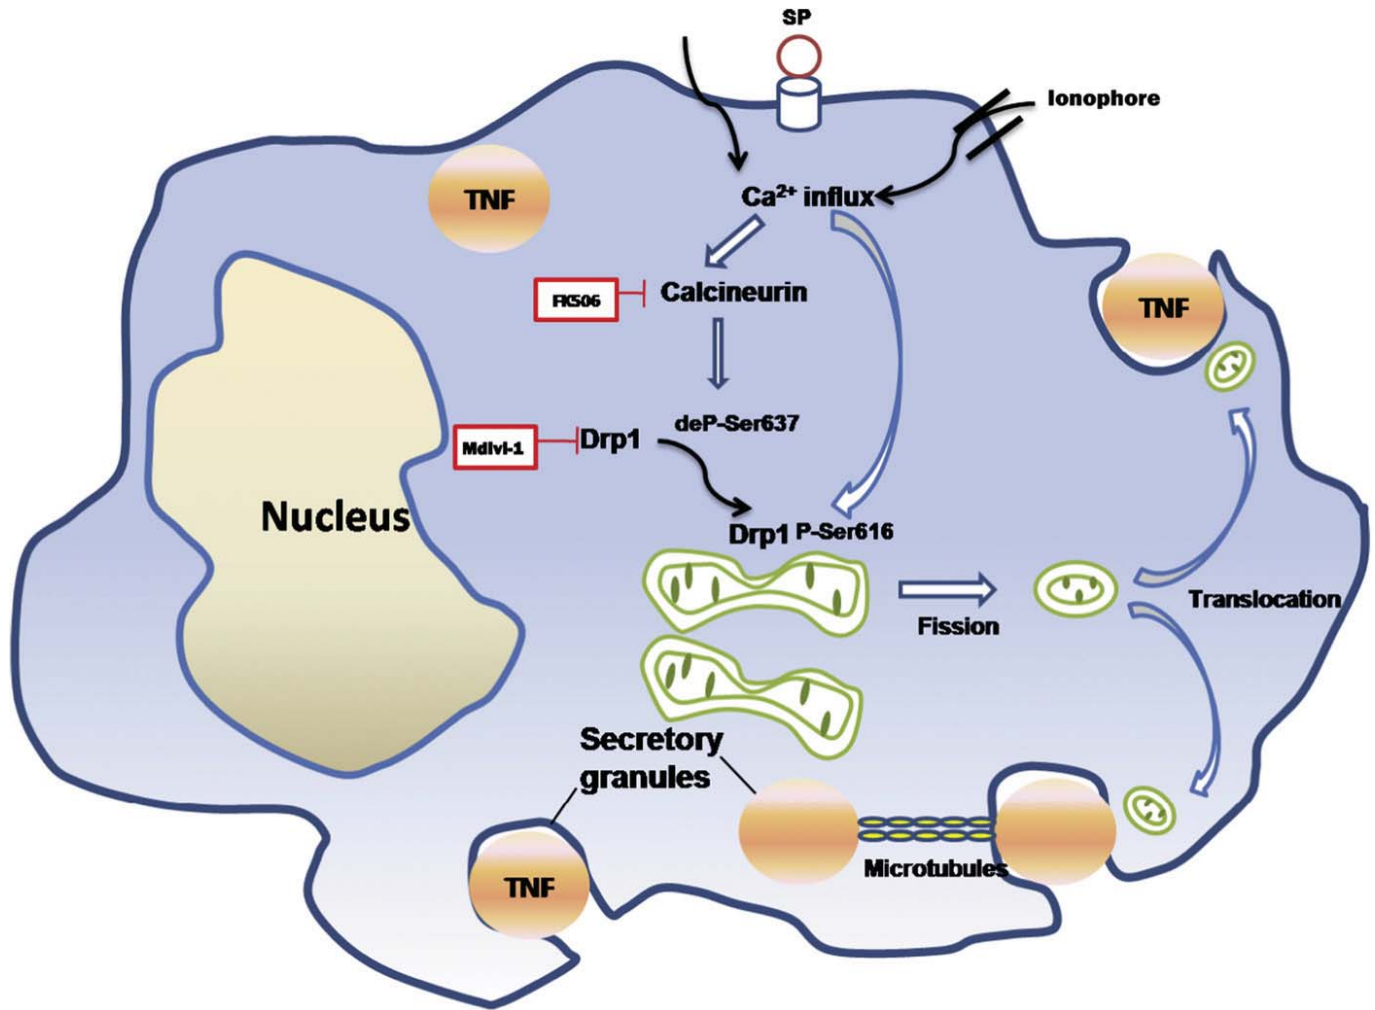

**FIG E7.** Diagrammatic representation of the proposed intracellular steps involved in mitochondrial fission and translocation during human mast cell degranulation. *deP*, Dephosphorylated.
